# Supplementary material
Source: MDPI journal article supplement (https://www.mdpi.com/2077-0472/13/8/1508)
Supplement: s1 [file s1 › agriculture-2483216-SI.pdf]

## Supplementary data

# An Overview of Climate Change Impacts on Agriculture and their mitigation strategies

Farhana Bibi<sup>1</sup>, Azizur Rahman<sup>2,\*</sup>

<sup>1</sup> Department of Biosciences, Grand Asian University Sialkot, 51040, Pakistan.

<sup>2</sup> Centre for Climate Change Research, University of Toronto, Toronto, ON M5G 1L5, Canada.

\* Correspondence: mazizur.rahman@utoronto.ca; aziz@climatechangeresearch.ca.

**Suppl. Table S1: Physiological and biochemical responses of plants upon abiotic stresses**

| Sr. No | Parameter                                        | Crop           | Physiological & biochemical responses to stress                                                                                                                                                                                           | Ref. |
|--------|--------------------------------------------------|----------------|-------------------------------------------------------------------------------------------------------------------------------------------------------------------------------------------------------------------------------------------|------|
| 1      | Heat stress (32 °C)                              | Tomato         | Decrease in fruit yield, increase in antioxidant content in leaf and fruit                                                                                                                                                                | [1]  |
| 2      | Heat Stress (35°C/25°C : day/night)              | Lamb's Lettuce | Decrease in plant biomass and photosynthetic pigments, accumulation of high H <sub>2</sub> O <sub>2</sub> in leaf                                                                                                                         | [2]  |
| 3      | Salinity Stress (75mM NaCl)                      | Rice           | Depletion in cellular water content, higher accumulation of Na <sup>+</sup> , decrease in photosynthetic pigments Chl a and Chl b, Activation of aquaponic genes                                                                          | [3]  |
| 4      | Heat stress (35-42 °C)                           | Rice           | Decrease in seedlings growth and chlorophyll content, decrease in survival rate by 18-20%, increase in percentage of injury                                                                                                               | [4]  |
| 5      | Heat stress (38 °C/ 31 °C : day/night)           | Wheat          | Changes in rate of evapotranspiration, increased plants wilting, increase water loss in tissues, decrease in volume                                                                                                                       | [5]  |
| 6      | Low temperature stress (9 °C/ 5 °C : day/ night) | Cucumber       | Increased electrolytes leakage, hydrogen peroxide levels and intracellular concentration of CO <sub>2</sub> , decrease in relative water content, net photosynthetic rate, rate of transpiration, stomatal conductance, and leaf pigments | [6]  |

|    |                                                                     |                                       |                                                                                                                             |      |
|----|---------------------------------------------------------------------|---------------------------------------|-----------------------------------------------------------------------------------------------------------------------------|------|
| 7  | High CO2 levels                                                     | Wheat<br><br>(heat tolerant genotype) | Decrease in lysine metabolism, and metabolites including N acetylornithine, overall yield did not improved                  | [7]  |
| 8  | Elevated CO2 levels                                                 | Barley                                | Decrease in specific leaf area and stomatal conductance, decrease in transpiration rate                                     | [8]  |
| 9  | Salinity stress (150-300mM NaCl)                                    | Sugarcane                             | Decrease in photosynthetic rate, stomatal conductance and photoassimilate transportation from leaves to other plant tissues | [9]  |
| 10 | Salinity stress (250mM NaCl)                                        | Soybean                               | Decrease in photosynthetic pigments, carbohydrates, phenolic content, flavonoids and antioxidants                           | [10] |
| 11 | Salinity + Heat Stress<br><br>(75mM NaCl + 30 C/ 26 C : day/ night) | Rice                                  | Reduced dry and fresh weight of shoots, reduced relative water content of leaves                                            | [3]  |

## Suppl. Table S2: Effect of Biochar on crops and soil properties

| Sr. No. | Type of Biochar     | Crop       | Treatment effect on soil                                                                                                                                                                                 | Treatment effect on crops                                                                                                                | Ref. |
|---------|---------------------|------------|----------------------------------------------------------------------------------------------------------------------------------------------------------------------------------------------------------|------------------------------------------------------------------------------------------------------------------------------------------|------|
| 1.      | Pine needle Biochar | Chick pea  | Treatment resulted in elevated water holding capacity, Buffered the soil pH to 6.5                                                                                                                       | Increase in Biomass and plant fresh weight                                                                                               | [11] |
| 2.      | Corn stalk Biochar  | Sugar Beet | Reduction in soil fomesafen residues by 29-46%, increase in soil pH by 3.49%, increase in soil water content by 13.8%, increase in soil nitrogen, potassium, soil organic matter by 9.68, 17.7 and 11.8% | Increase in growth, development and photosynthetic content of crop                                                                       | [12] |
| 3.      | Sunflower Biochar   | Millet     | Increased soil water content by 47%, increased soil dissolved organic carbon by 90% and nitrogen by 74%                                                                                                  | Increased plants nutrients sodium, potassium and phosphorus, increased leaf relative water content by 40%, improved overall yield by 58% | [13] |

|    |                          |                 |                                                                                       |                                                                                                                                        |      |
|----|--------------------------|-----------------|---------------------------------------------------------------------------------------|----------------------------------------------------------------------------------------------------------------------------------------|------|
| 4. | Sunflower Plate Bio-char | Rice            | Increased soil pH and pH buffering capacity, reduced the available Cd content of soil | Reduced the potential risk of cadmium absorption by rice plants                                                                        | [14] |
| 5. | Biochar-Fertilizer       | Chinese Cabbage | Increased the inorganic nitrogen content of soil                                      | Increased leaf length, width and leaf number. Increased the nitrogen utilization efficiency, amino acids, sugars and vitamin C content | [15] |
|    |                          | Maize           |                                                                                       | Increased plants height, stem diameter, ear height and starch content of grains                                                        |      |

## References

- [1] T. Mesa, J. Polo, A. Arabia, V. Caselles, and S. Munné-Bosch, "Differential physiological response to heat and cold stress of tomato plants and its implication on fruit quality," *J. Plant Physiol.*, vol. 268, p. 153581, 2022, doi: <https://doi.org/10.1016/j.jplph.2021.153581>.
- [2] B. Hawrylak-Nowak, S. Dresler, K. Rubinowska, R. Matraszek-Gawron, W. Woch, and M. Hasanuz-zaman, "Selenium biofortification enhances the growth and alters the physiological response of lamb's lettuce grown under high temperature stress," *Plant Physiol. Biochem.*, vol. 127, pp. 446–456, 2018, doi: <https://doi.org/10.1016/j.plaphy.2018.04.018>.
- [3] L. Nahar, M. Aycan, S. Hanamata, M. Baslam, and T. Mitsui, "Impact of Single and Combined Salinity and High-Temperature Stresses on Agro-Physiological, Biochemical, and Transcriptional Responses in Rice and Stress-Release," *Plants*, vol. 11, no. 4, 2022, doi: 10.3390/plants11040501.
- [4] S. Aryan *et al.*, "Phenological and physiological responses of hybrid rice under different high-temperature at seedling stage," *Bull. Natl. Res. Cent.*, vol. 46, no. 1, p. 45, 2022, doi: 10.1186/s42269-022-00742-y.
- [5] P. M. P. Correia, J. Cairo Westergaard, A. da Silva, T. Roitsch, E. Carmo-Silva, and J. da Silva, "High-throughput phenotyping of physiological traits for wheat resilience to high temperature and drought stress," *J. Exp. Bot.*, vol. 73, no. 15, pp. 5235–5251, 2022, doi: 10.1093/jxb/erac160.
- [6] B. Amin *et al.*, "Biochemical and Physiological Responses of Cucumis sativus Cultivars to Different Combinations of Low-Temperature and High Humidity," *J. Plant Growth Regul.*, vol. 42, no. 1, pp. 390–406, 2023, doi: 10.1007/s00344-021-10556-3.
- [7] L. O. A. Abdelhakim *et al.*, "Elevated CO<sub>2</sub> Improves the Physiology but Not the Final Yield in Spring Wheat Genotypes Subjected to Heat and Drought Stress During Anthesis," *Front. Plant Sci.*, vol. 13, no. March, 2022, doi: 10.3389/fpls.2022.824476.
- [8] Y. Chen, Z. Wei, H. Wan, J. Zhang, J. Liu, and F. Liu, "CO<sub>2</sub> Elevation and Nitrogen Supply Alter the Growth and Physiological Responses of Tomato and Barley Plants to Drought Stress," *Agronomy*, vol. 12, no. 8, 2022, doi: 10.3390/agronomy12081821.
- [9] D. Zhao, K. Zhu, A. Momotaz, and X. Gao, "Sugarcane Plant Growth and Physiological Responses to Soil Salinity during Tillering and Stalk Elongation," *Agriculture*, vol. 10, no. 12, 2020, doi: 10.3390/agriculture10120608.
- [10] P. Mangena, "Role of Benzyladenine Seed Priming on Growth and Physiological and Biochemical

Response of Soybean Plants Grown under High Salinity Stress Condition," *Int. J. Agron.*, vol. 2020, p. 8847098, 2020, doi: 10.1155/2020/8847098.

- [11] B. Fatima *et al.*, "Accompanying effects of sewage sludge and pine needle biochar with selected organic additives on the soil and plant variables," *Waste Manag.*, vol. 153, pp. 197–208, 2022, doi: <https://doi.org/10.1016/j.wasman.2022.08.016>.
- [12] X. Li *et al.*, "Influence of Biochar on Soil Properties and Morphophysiology of Sugar Beet Under Fomesafen Residues," *J. Soil Sci. Plant Nutr.*, 2023, doi: 10.1007/s42729-023-01157-y.
- [13] M. al-R. Taheri, A. R. Astaraei, A. Lakzian, and H. Emami, "The role of biochar and sulfur-modified biochar on soil water content, biochemical properties and millet crop under saline-sodic and calcareous soil," *Plant Soil*, 2023, doi: 10.1007/s11104-023-05912-z.
- [14] H. Lu *et al.*, "Effects of the increases in soil pH and pH buffering capacity induced by crop residue biochars on available Cd contents in acidic paddy soils," *Chemosphere*, vol. 301, p. 134674, 2022, doi: <https://doi.org/10.1016/j.chemosphere.2022.134674>.
- [15] H. Zhao, T. Xie, H. Xiao, and M. Gao, "Biochar-Based Fertilizer Improved Crop Yields and N Utilization Efficiency in a Maize&ndash;Chinese Cabbage Rotation System," *Agriculture*, vol. 12, no. 7, 2022, doi: 10.3390/agriculture12071030.
